# Supplementary material
Source: PubMed Central journal article supplement (PMC9539539)

# THE LANCET

## Supplementary appendix 2

This appendix formed part of the original submission and has been peer reviewed. We post it as supplied by the authors.

Supplement to: Wong CKH, Au ICH, Lau KTK, et al. Real-world effectiveness of molnupiravir and nirmatrelvir plus ritonavir against mortality, hospitalisation, and in-hospital outcomes among community-dwelling, ambulatory patients with confirmed SARS-CoV-2 infection during the omicron wave in Hong Kong: an observational study. *Lancet* 2022; **400**: 1213–22.

## **Appendix 2**

Supplementary Table 1. Baseline characteristics of non-hospitalized patients with COVID-19 in (a) outpatient molnupiravir and respective control groups, and (b) outpatient nirmatrelvir/ritonavir and respective control groups before 1:10 propensity score matching

Supplementary Table 2. Characteristics of case and control groups for outcomes of all-cause mortality, hospitalization, and in-hospital disease progression outcome after matching

Supplementary Table 3. Odds ratios of outpatient molnupiravir and nirmatrelvir/ritonavir exposure between cases and controls after matching in case-control study design

Supplementary Table 4. Post-hoc sensitivity analyses of treating time-varying oral antiviral use as time-varying covariate in Cox regression model

Supplementary Table 5. Subgroup analyses of outcomes for (a) outpatient molnupiravir users versus matched controls, and (b) outpatient nirmatrelvir/ritonavir users versus matched controls by vaccination status and age groups

Supplementary Table 6. STROBE Statement—Checklist of items that should be included in reports of cohort studies

Supplementary Figure 1. Proposed therapeutic management of adults with COVID-19 based on disease severity as recommended by the Hospital Authority

Supplementary Figure 2. Distribution of propensity-score in oral antiviral and control groups before and after the propensity-score matching

Supplementary Table 1. Baseline characteristics of non-hospitalized patients with COVID-19 in (a) molnupiravir and respective control groups, and (b) nirmatrelvir/ritonavir and respective control groups before 1:10 propensity score matching

| Baseline characteristics   | Before 1:10 matching      |         |                        |         |      |                                     |         |                        |         |      |
|----------------------------|---------------------------|---------|------------------------|---------|------|-------------------------------------|---------|------------------------|---------|------|
|                            | Molnupiravir<br>(n=5,383) |         | Control<br>(n=923,783) |         | SMD  | Nirmatrelvir/ritonavir<br>(n=6,464) |         | Control<br>(n=922,702) |         | SMD  |
|                            | N                         | %       | N                      | %       |      | N                                   | %       | N                      | %       |      |
| Age, years                 |                           |         |                        |         |      |                                     |         |                        |         |      |
| 18-60                      | 574                       | (10.7%) | 667,030                | (72.2%) | 1.60 | 875                                 | (13.5%) | 666,729                | (72.3%) | 1.47 |
| >60                        | 4,809                     | (89.3%) | 256,753                | (27.8%) |      | 5,589                               | (86.5%) | 255,973                | (27.7%) |      |
| Sex                        |                           |         |                        |         | 0.03 |                                     |         |                        |         | 0.00 |
| Male                       | 2,552                     | (47.4%) | 426,198                | (46.1%) |      | 2,988                               | (46.2%) | 425,762                | (46.1%) |      |
| Female                     | 2,831                     | (52.6%) | 497,585                | (53.9%) |      | 3,476                               | (53.8%) | 496,940                | (53.9%) |      |
| Time of COVID-19 diagnosis |                           |         |                        |         |      |                                     |         |                        |         |      |
| February to March 2022     | 4,367                     | (81.1%) | 886,850                | (96.0%) | 0.48 | 3,962                               | (61.3%) | 887,255                | (96.2%) | 0.94 |
| April to June 2022         | 1,016                     | (18.9%) | 36,933                 | (4.0%)  |      | 2,502                               | (38.7%) | 35,447                 | (3.8%)  |      |
| Charlson's Index           |                           |         |                        |         |      |                                     |         |                        |         |      |
| 0-4                        | 4,709                     | (87.5%) | 918,229                | (99.4%) | 0.50 | 6,159                               | (95.3%) | 916,779                | (99.4%) | 0.26 |
| 5-6                        | 471                       | (8.8%)  | 3,823                  | (0.4%)  |      | 251                                 | (3.9%)  | 4,043                  | (0.4%)  |      |
| 7-14                       | 203                       | (3.8%)  | 1,731                  | (0.2%)  |      | 54                                  | (0.8%)  | 1,880                  | (0.2%)  |      |
| Fully vaccinated*          | 803                       | (14.9%) | 498,090                | (53.9%) | 0.90 | 1,923                               | (29.7%) | 496,970                | (53.9%) | 0.50 |

Notes: NA = not applicable; SMD = standardized mean difference

\* Fully vaccinated patients were defined as those with at least 2 doses of BNT162b2 (Comirnaty) or 3 doses of COVID-19 Vaccine (Vero Cell), Inactivated (CoronaVac).

Supplementary Table 2. Characteristics of case and control groups for outcomes of all-cause mortality, hospitalization, and in-hospital disease progression outcome after matching

| Baseline characteristics   | All-cause mortality |         |                      |         | Hospitalization   |         |                       |         | In-hospital disease progression |         |                      |         |
|----------------------------|---------------------|---------|----------------------|---------|-------------------|---------|-----------------------|---------|---------------------------------|---------|----------------------|---------|
|                            | Case<br>(n=1,006)   |         | Control<br>(n=9,675) |         | Case<br>(n=2,041) |         | Control<br>(n=18,833) |         | Case<br>(n=719)                 |         | Control<br>(n=6,831) |         |
|                            | N                   | %       | N                    | %       | N                 | %       | N                     | %       | N                               | %       | N                    | %       |
| Age, years                 |                     |         |                      |         |                   |         |                       |         |                                 |         |                      |         |
| 18-60                      | 81                  | (8.1%)  | 496                  | (5.1%)  | 1,211             | (59.3%) | 11,023                | (58.5%) | 113                             | (15.7%) | 981                  | (14.4%) |
| >60                        | 925                 | (92.0%) | 9,179                | (94.9%) | 830               | (40.7%) | 7,810                 | (41.5%) | 606                             | (84.3%) | 5,850                | (85.6%) |
| Sex                        |                     |         |                      |         |                   |         |                       |         |                                 |         |                      |         |
| Male                       | 598                 | (59.4%) | 5,611                | (58.0%) | 900               | (44.1%) | 8,372                 | (44.5%) | 417                             | (58.0%) | 3,906                | (57.2%) |
| Female                     | 408                 | (40.6%) | 4,064                | (42.0%) | 1,141             | (55.9%) | 10,461                | (55.5%) | 302                             | (42.0%) | 2,925                | (42.8%) |
| Time of COVID-19 diagnosis |                     |         |                      |         |                   |         |                       |         |                                 |         |                      |         |
| February to March 2022     | 953                 | (94.7%) | 9,281                | (95.9%) | 1,887             | (92.5%) | 16,831                | (89.4%) | 688                             | (95.7%) | 6,454                | (94.5%) |
| April to June 2022         | 53                  | (5.3%)  | 394                  | (4.1%)  | 154               | (7.6%)  | 2,002                 | (10.6%) | 31                              | (4.3%)  | 377                  | (5.5%)  |
| Charlson's Index           |                     |         |                      |         |                   |         |                       |         |                                 |         |                      |         |
| 0-4                        | 567                 | (56.4%) | 6,298                | (65.1%) | 1,736             | (85.1%) | 17,936                | (95.2%) | 233                             | (32.4%) | 2,838                | (41.6%) |
| 5-6                        | 259                 | (25.8%) | 2,052                | (21.2%) | 251               | (12.3%) | 816                   | (4.3%)  | 314                             | (43.7%) | 2,596                | (38.0%) |
| 7-14                       | 180                 | (17.9%) | 1,325                | (13.7%) | 54                | (2.7%)  | 81                    | (0.4%)  | 172                             | (23.9%) | 1,397                | (20.5%) |
| Fully vaccinated*          | 226                 | (22.5%) | 2,028                | (21.0%) | 815               | (39.9%) | 8,322                 | (44.2%) | 244                             | (33.9%) | 2,474                | (36.2%) |

Notes: NA = not applicable; SMD = standardized mean difference

\* Fully vaccinated patients were defined as those with at least 2 doses of BNT162b2 (Comirnaty) or 3 doses of COVID-19 Vaccine (Vero Cell), Inactivated (CoronaVac).

Supplementary Table 3. Odds ratios of outpatient molnupiravir and nirmatrelvir/ritonavir exposure between cases and controls after matching in case-control study design

| All-cause mortality             | Case (N=1,006) | Control (N=9,675)  | OR   | 95% CI       | P-value |
|---------------------------------|----------------|--------------------|------|--------------|---------|
| Non-users                       | 964 (95.8%)    | 8,719 (90.1%)      |      | (reference)  |         |
| Molnupiravir users              | 35 (3.5%)      | 679 (7.0%)         | 0.47 | (0.33, 0.66) | <0.0001 |
| Nirmatrelvir/ritonavir users    | 7 (0.7%)       | 277 (2.9%)         | 0.23 | (0.11, 0.49) | 0.0001  |
| Hospitalization                 | Case (N=2,041) | Control (N=18,833) | OR   | 95% CI       | P-value |
| Non-users                       | 1,930 (94.6%)  | 17,311 (91.9%)     |      | (reference)  |         |
| Molnupiravir users              | 70 (3.4%)      | 662 (3.5%)         | 0.95 | (0.74, 1.22) | 0.68    |
| Nirmatrelvir/ritonavir users    | 41 (2.0%)      | 860 (4.6%)         | 0.43 | (0.31, 0.59) | <0.0001 |
| In-hospital disease progression | Case (N=719)   | Control (N=6,831)  | OR   | 95% CI       | P-value |
| Non-users                       | 656 (91.2%)    | 5,914 (86.6%)      |      | (reference)  |         |
| Molnupiravir users              | 42 (5.8%)      | 609 (8.9%)         | 0.62 | (0.45, 0.86) | 0.0039  |
| Nirmatrelvir/ritonavir users    | 21 (2.9%)      | 308 (4.5%)         | 0.61 | (0.39, 0.96) | 0.034   |

Notes: OR = Odds ratio; CI = confidence interval

Supplementary Table 4. Post-hoc sensitivity analyses of treating oral antiviral use as time-varying covariate in Cox regression model

| Outcomes                        | Molnupiravir vs Control |              |         | Nirmatrelvir/ritonavir vs Control |              |         |
|---------------------------------|-------------------------|--------------|---------|-----------------------------------|--------------|---------|
|                                 | HR†                     | 95% CI       | P-value | HR†                               | 95% CI       | P-value |
| All-cause mortality             | 0.78                    | (0.63, 0.97) | 0.025   | 0.35                              | (0.23, 0.54) | <0.0001 |
| Hospitalization                 | 1.11                    | (1.02, 1.21) | 0.020   | 0.85                              | (0.75, 0.97) | 0.018   |
| In-hospital disease progression | 0.60                    | (0.45, 0.80) | 0.00039 | 0.60                              | (0.40, 0.91) | 0.015   |

Notes: HR = hazard ratio; CI = confidence interval

† HR >1 (or <1) indicates oral antiviral users had higher (lower) risk of outcome compared to the matched control group.

Supplementary Table 5. Subgroup analyses of outcomes for (a) outpatient molnupiravir users versus matched controls, and (b) outpatient nirmatrelvir/ritonavir users versus matched controls by vaccination status and age groups

| Outcomes                            | Molnupiravir (N=4,983)                                 |                |             | Control (N=49,234)                                     |                |             | Molnupiravir vs Control |              |         |                  |
|-------------------------------------|--------------------------------------------------------|----------------|-------------|--------------------------------------------------------|----------------|-------------|-------------------------|--------------|---------|------------------|
|                                     | Crude incidence rate<br>(Events / 100,000 person-days) |                |             | Crude incidence rate<br>(Events / 100,000 person-days) |                |             | HR†                     | 95% CI       | P-value | P <sub>int</sub> |
|                                     | Estimate                                               | 95% CI         | Person-days | Estimate                                               | 95% CI         | Person-days |                         |              |         |                  |
| All-cause mortality                 | 17.9                                                   | (14.3, 22.0)   | 492,995     | 22.1                                                   | (20.9, 23.4)   | 5,134,524   | 0.76                    | (0.61, 0.95) | 0.013   |                  |
| With full SARS-CoV-2 vaccination    | 2.6                                                    | (0.3, 9.3)     | 77,321      | 3.9                                                    | (2.6, 5.6)     | 768,346     | 0.66                    | (0.16, 2.77) | 0.57    | 0.72             |
| Without full SARS-CoV-2 vaccination | 22.9                                                   | (18.5, 28.0)   | 415,417     | 25.4                                                   | (23.9, 27.0)   | 4,281,002   | 0.85                    | (0.70, 1.05) | 0.13    |                  |
| Age ≤60                             | 7.4                                                    | (2.0, 19.0)    | 54,037      | 3.0                                                    | (1.8, 4.9)     | 560,530     | 2.31                    | (0.77, 6.90) | 0.13    | 0.047            |
| Age >60                             | 19.9                                                   | (15.9, 24.5)   | 438,221     | 25.4                                                   | (23.9, 26.9)   | 4,494,192   | 0.75                    | (0.60, 0.93) | 0.0076  |                  |
| Hospitalization                     | 107.6                                                  | (98.2, 117.6)  | 450,697     | 104.0                                                  | (101.1, 107.0) | 4,740,249   | 0.98                    | (0.89, 1.06) | 0.58    |                  |
| With full SARS-CoV-2 vaccination    | 27.8                                                   | (17.2, 42.6)   | 75,412      | 42.5                                                   | (37.9, 47.5)   | 741,323     | 0.66                    | (0.42, 1.02) | 0.063   | 0.059            |
| Without full SARS-CoV-2 vaccination | 126.0                                                  | (114.9, 137.9) | 375,286     | 117.9                                                  | (114.6, 121.4) | 3,913,988   | 1.01                    | (0.93, 1.10) | 0.76    |                  |
| Age ≤60                             | 87.7                                                   | (63.7, 117.7)  | 50,171      | 71.5                                                   | (64.4, 79.1)   | 528,872     | 1.15                    | (0.84, 1.59) | 0.38    | 0.12             |
| Age >60                             | 108.4                                                  | (98.5, 119.1)  | 401,121     | 117.5                                                  | (114.2, 120.9) | 4,103,751   | 0.89                    | (0.81, 0.97) | 0.0067  |                  |
| In-hospital disease progression     | 10.2                                                   | (7.5, 13.4)    | 491,635     | 16.8                                                   | (15.7, 18.0)   | 5,115,217   | 0.57                    | (0.43, 0.76) | 0.00011 |                  |
| With full SARS-CoV-2 vaccination    | 2.6                                                    | (0.3, 9.4)     | 77,223      | 4.4                                                    | (3.1, 6.2)     | 766,475     | 0.58                    | (0.14, 2.43) | 0.46    | 0.85             |
| Without full SARS-CoV-2 vaccination | 13.5                                                   | (10.2, 17.6)   | 413,914     | 19.2                                                   | (17.9, 20.6)   | 4,263,643   | 0.67                    | (0.51, 0.87) | 0.0029  |                  |
| Age ≤60                             | 5.6                                                    | (1.1, 16.3)    | 53,845      | 4.5                                                    | (2.9, 6.6)     | 558,668     | 1.18                    | (0.35, 3.98) | 0.79    | 0.23             |
| Age >60                             | 11.0                                                   | (8.1, 14.6)    | 437,115     | 19.0                                                   | (17.8, 20.3)   | 4,475,352   | 0.55                    | (0.42, 0.73) | <0.0001 |                  |

  

| Outcomes                         | Nirmatrelvir/ritonavir (N=5,542)                       |            |             | Control (N=54,672)                                     |              |             | Nirmatrelvir/ritonavir vs Control |              |         |                  |
|----------------------------------|--------------------------------------------------------|------------|-------------|--------------------------------------------------------|--------------|-------------|-----------------------------------|--------------|---------|------------------|
|                                  | Crude incidence rate<br>(Events / 100,000 person-days) |            |             | Crude incidence rate<br>(Events / 100,000 person-days) |              |             | HR†                               | 95% CI       | P-value | P <sub>int</sub> |
|                                  | Estimate                                               | 95% CI     | Person-days | Estimate                                               | 95% CI       | Person-days |                                   |              |         |                  |
| All-cause mortality              | 4.2                                                    | (2.6, 6.3) | 528,328     | 11.6                                                   | (10.8, 12.6) | 5,471,588   | 0.34                              | (0.22, 0.52) | <0.0001 |                  |
| With full SARS-CoV-2 vaccination | 0.6                                                    | (0.0, 3.3) | 169,612     | 2.3                                                    | (1.6, 3.2)   | 1,683,420   | NA                                | NA           | NA      | NA               |

|                                     |      |              |         |      |              |           |      |              |         |       |
|-------------------------------------|------|--------------|---------|------|--------------|-----------|------|--------------|---------|-------|
| Without full SARS-CoV-2 vaccination | 7.1  | (4.6, 10.4)  | 353,876 | 15.1 | (13.9, 16.4) | 3,664,797 | 0.44 | (0.30, 0.66) | <0.0001 |       |
| Age ≤60                             | 0.0  | NA           | 72,254  | 1.2  | (0.5, 2.3)   | 752,585   | NA   | NA           | NA      | NA    |
| Age >60                             | 5.2  | (3.3, 7.8)   | 443,793 | 10.5 | (9.6, 11.5)  | 4,447,743 | 0.48 | (0.32, 0.74) | 0.00069 |       |
| Hospitalization                     | 48.5 | (42.6, 54.9) | 507,655 | 61.0 | (58.9, 63.2) | 5,221,023 | 0.76 | (0.67, 0.86) | <0.0001 |       |
| With full SARS-CoV-2 vaccination    | 20.4 | (14.1, 28.5) | 166,753 | 28.3 | (25.8, 31.0) | 1,644,167 | 0.71 | (0.51, 1.01) | 0.056   | 0.77  |
| Without full SARS-CoV-2 vaccination | 60.6 | (52.6, 69.5) | 336,624 | 76.0 | (73.1, 78.9) | 3,460,742 | 0.76 | (0.66, 0.87) | 0.00012 |       |
| Age ≤60                             | 25.4 | (15.1, 40.2) | 70,793  | 46.9 | (42.0, 52.1) | 727,665   | 0.50 | (0.31, 0.81) | 0.0050  | 0.071 |
| Age >60                             | 51.5 | (44.9, 58.8) | 425,314 | 63.8 | (61.4, 66.3) | 4,228,069 | 0.80 | (0.69, 0.91) | 0.0011  |       |
| In-hospital disease progression     | 4.6  | (2.9, 6.8)   | 526,844 | 7.5  | (6.8, 8.3)   | 5,462,351 | 0.57 | (0.38, 0.87) | 0.0083  |       |
| With full SARS-CoV-2 vaccination    | 1.2  | (0.1, 4.3)   | 169,422 | 2.0  | (1.4, 2.8)   | 1,681,789 | 0.58 | (0.14, 2.41) | 0.45    | 0.75  |
| Without full SARS-CoV-2 vaccination | 7.4  | (4.8, 10.8)  | 352,506 | 9.5  | (8.5, 10.6)  | 3,657,771 | 0.73 | (0.49, 1.09) | 0.13    |       |
| Age ≤60                             | 0.0  | NA           | 72,254  | 1.6  | (0.8, 2.8)   | 751,775   | NA   | NA           | NA      | NA    |
| Age >60                             | 5.7  | (3.7, 8.3)   | 442,233 | 7.8  | (7.0, 8.7)   | 4,438,436 | 0.71 | (0.47, 1.06) | 0.096   |       |

Notes: HR = hazard ratio; CI = confidence interval; NA = not applicable; P<sub>int</sub> = P-value for interaction

† HR >1 (or <1) indicates oral antiviral users had higher (lower) risk of outcome compared to the matched control group.

HR were estimated only when the number of events in both groups were more than or equal to 2.



Supplementary Table 6. STROBE Statement—Checklist of items that should be included in reports of *cohort studies*

|                              | <b>Item No</b> | <b>Recommendation</b>                                                                                                                                                                | <b>Page No</b> |
|------------------------------|----------------|--------------------------------------------------------------------------------------------------------------------------------------------------------------------------------------|----------------|
| <b>Title and abstract</b>    | 1              | (a) Indicate the study’s design with a commonly used term in the title or the abstract                                                                                               | 1, 2           |
|                              |                | (b) Provide in the abstract an informative and balanced summary of what was done and what was found                                                                                  | 2-3            |
| <b>Introduction</b>          |                |                                                                                                                                                                                      |                |
| Background/rationale         | 2              | Explain the scientific background and rationale for the investigation being reported                                                                                                 | 6              |
| Objectives                   | 3              | State specific objectives, including any prespecified hypotheses                                                                                                                     | 6              |
| <b>Methods</b>               |                |                                                                                                                                                                                      |                |
| Study design                 | 4              | Present key elements of study design early in the paper                                                                                                                              | 7-8            |
| Setting                      | 5              | Describe the setting, locations, and relevant dates, including periods of recruitment, exposure, follow-up, and data collection                                                      | 7-8            |
| Participants                 | 6              | (a) Give the eligibility criteria, and the sources and methods of selection of participants. Describe methods of follow-up                                                           | 7-8            |
|                              |                | (b) For matched studies, give matching criteria and number of exposed and unexposed                                                                                                  | 7-8            |
| Variables                    | 7              | Clearly define all outcomes, exposures, predictors, potential confounders, and effect modifiers. Give diagnostic criteria, if applicable                                             | 8-9            |
| Data sources/<br>measurement | 8*             | For each variable of interest, give sources of data and details of methods of assessment (measurement). Describe comparability of assessment methods if there is more than one group | 8-9            |
| Bias                         | 9              | Describe any efforts to address potential sources of bias                                                                                                                            | 7-8            |
| Study size                   | 10             | Explain how the study size was arrived at                                                                                                                                            | Fig 1          |
| Quantitative variables       | 11             | Explain how quantitative variables were handled in the analyses. If applicable, describe which groupings were chosen and why                                                         | 9              |
| Statistical methods          | 12             | (a) Describe all statistical methods, including those used to control for confounding                                                                                                | 9-10           |
|                              |                | (b) Describe any methods used to examine subgroups and interactions                                                                                                                  | 10             |

|                   |     |                                                                                                                                                                                                              |                     |
|-------------------|-----|--------------------------------------------------------------------------------------------------------------------------------------------------------------------------------------------------------------|---------------------|
|                   |     | (c) Explain how missing data were addressed                                                                                                                                                                  | NA                  |
|                   |     | (d) If applicable, explain how loss to follow-up was addressed                                                                                                                                               | NA                  |
|                   |     | (e) Describe any sensitivity analyses                                                                                                                                                                        | 10                  |
| <b>Results</b>    |     |                                                                                                                                                                                                              |                     |
| Participants      | 13* | (a) Report numbers of individuals at each stage of study—eg numbers potentially eligible, examined for eligibility, confirmed eligible, included in the study, completing follow-up, and analysed            | Fig 1               |
|                   |     | (b) Give reasons for non-participation at each stage                                                                                                                                                         | Fig 1               |
|                   |     | (c) Consider use of a flow diagram                                                                                                                                                                           | Fig 1               |
| Descriptive data  | 14* | (a) Give characteristics of study participants (eg demographic, clinical, social) and information on exposures and potential confounders                                                                     | 10-11, Table 1      |
|                   |     | (b) Indicate number of participants with missing data for each variable of interest                                                                                                                          | NA                  |
|                   |     | (c) Summarise follow-up time (eg, average and total amount)                                                                                                                                                  | 11, Table 2         |
| Outcome data      | 15* | Report numbers of outcome events or summary measures over time                                                                                                                                               | 11-12, Table 2      |
| Main results      | 16  | (a) Give unadjusted estimates and, if applicable, confounder-adjusted estimates and their precision (eg, 95% confidence interval). Make clear which confounders were adjusted for and why they were included | 11-12, Table 2      |
|                   |     | (b) Report category boundaries when continuous variables were categorized                                                                                                                                    | NA                  |
|                   |     | (c) If relevant, consider translating estimates of relative risk into absolute risk for a meaningful time period                                                                                             | NA                  |
| Other analyses    | 17  | Report other analyses done—eg analyses of subgroups and interactions, and sensitivity analyses                                                                                                               | 12, Supp Tables 3-5 |
| <b>Discussion</b> |     |                                                                                                                                                                                                              |                     |
| Key results       | 18  | Summarise key results with reference to study objectives                                                                                                                                                     | 13                  |
| Limitations       | 19  | Discuss limitations of the study, taking into account sources of potential bias or imprecision. Discuss both direction and magnitude of any potential bias                                                   | 16                  |

|                          |    |                                                                                                                                                                            |        |
|--------------------------|----|----------------------------------------------------------------------------------------------------------------------------------------------------------------------------|--------|
| Interpretation           | 20 | Give a cautious overall interpretation of results considering objectives, limitations, multiplicity of analyses, results from similar studies, and other relevant evidence | 13-16  |
| Generalisability         | 21 | Discuss the generalisability (external validity) of the study results                                                                                                      | 13-16  |
| <b>Other information</b> |    |                                                                                                                                                                            |        |
| Funding                  | 22 | Give the source of funding and the role of the funders for the present study and, if applicable, for the original study on which the present article is based              | 10, 18 |

\*Give information separately for exposed and unexposed groups.

**Note:** An Explanation and Elaboration article discusses each checklist item and gives methodological background and published examples of transparent reporting.

The STROBE checklist is best used in conjunction with this article (freely available on the Web sites of PLoS Medicine at <http://www.plosmedicine.org/>, Annals of Internal Medicine at <http://www.annals.org/>, and Epidemiology at <http://www.epidem.com/>).

Information on the STROBE Initiative is available at <http://www.strobe-statement.org>.

Supplementary Figure 1. Proposed therapeutic management of adults with COVID-19 based on disease severity as recommended by the Hospital Authority

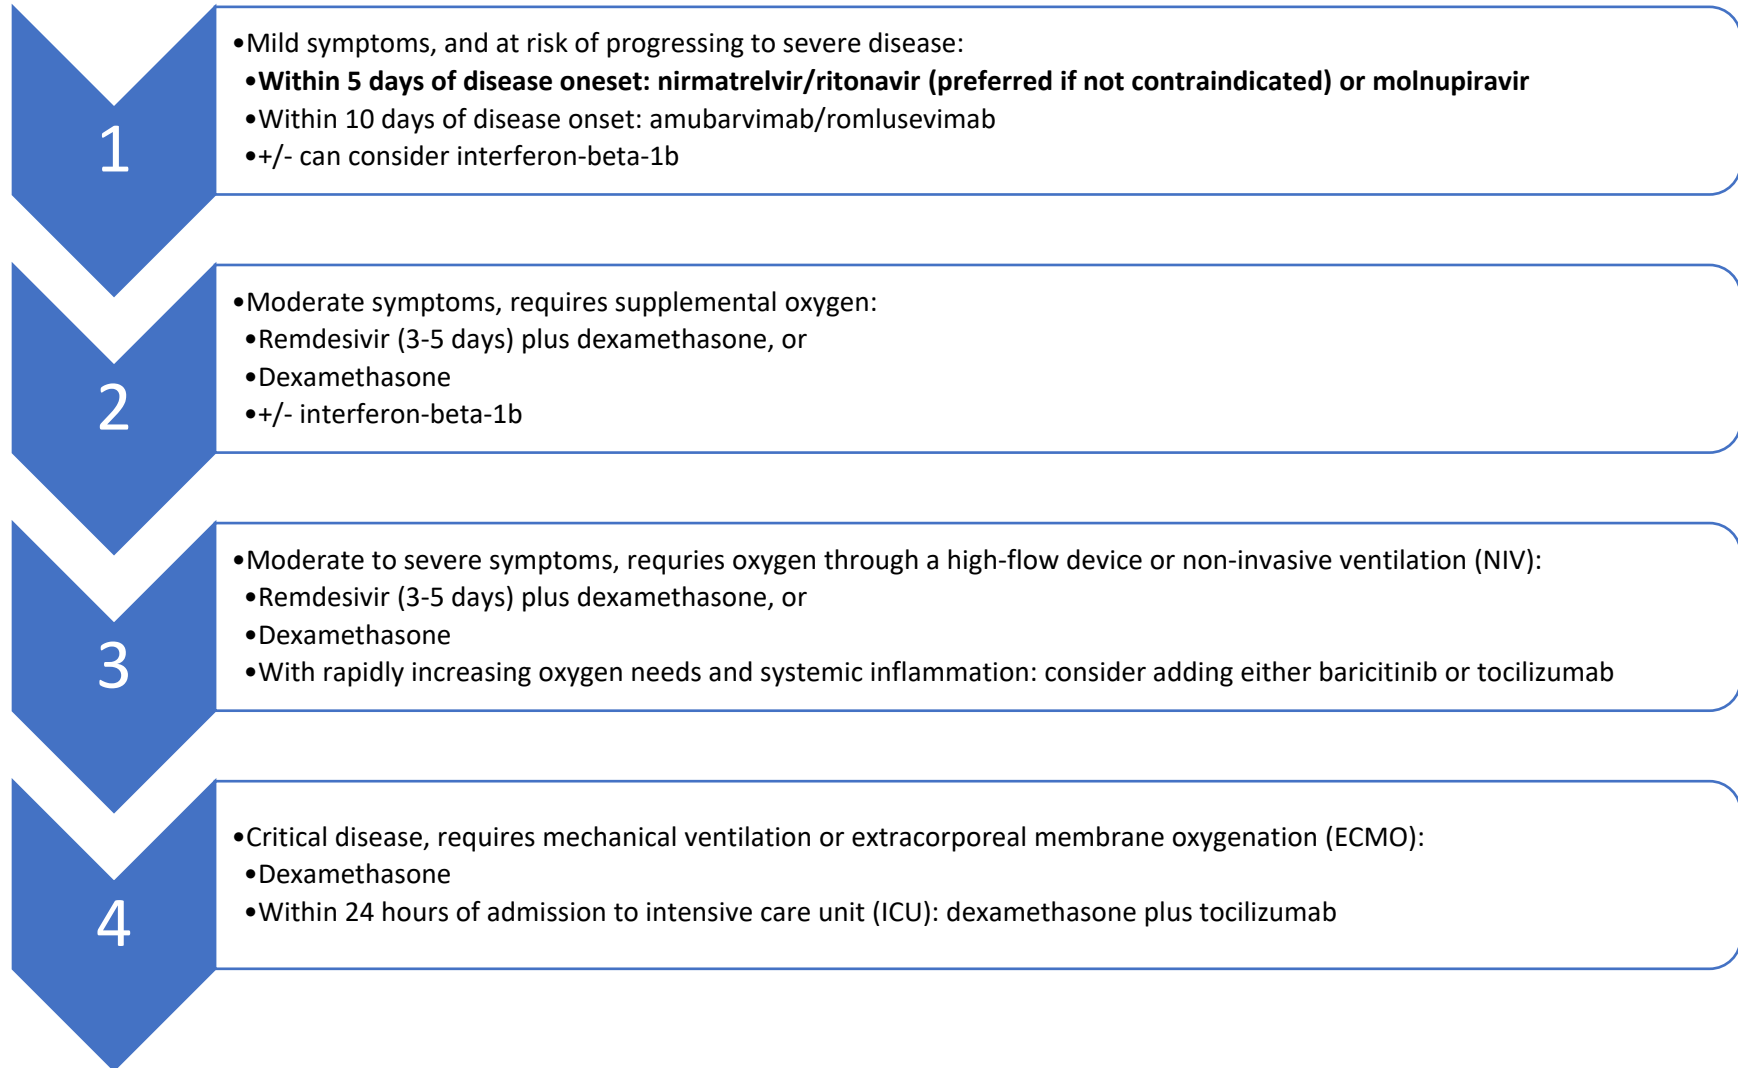

Supplementary Figure 2. Distribution of propensity-score in oral antiviral and control groups before and after the propensity-score matching

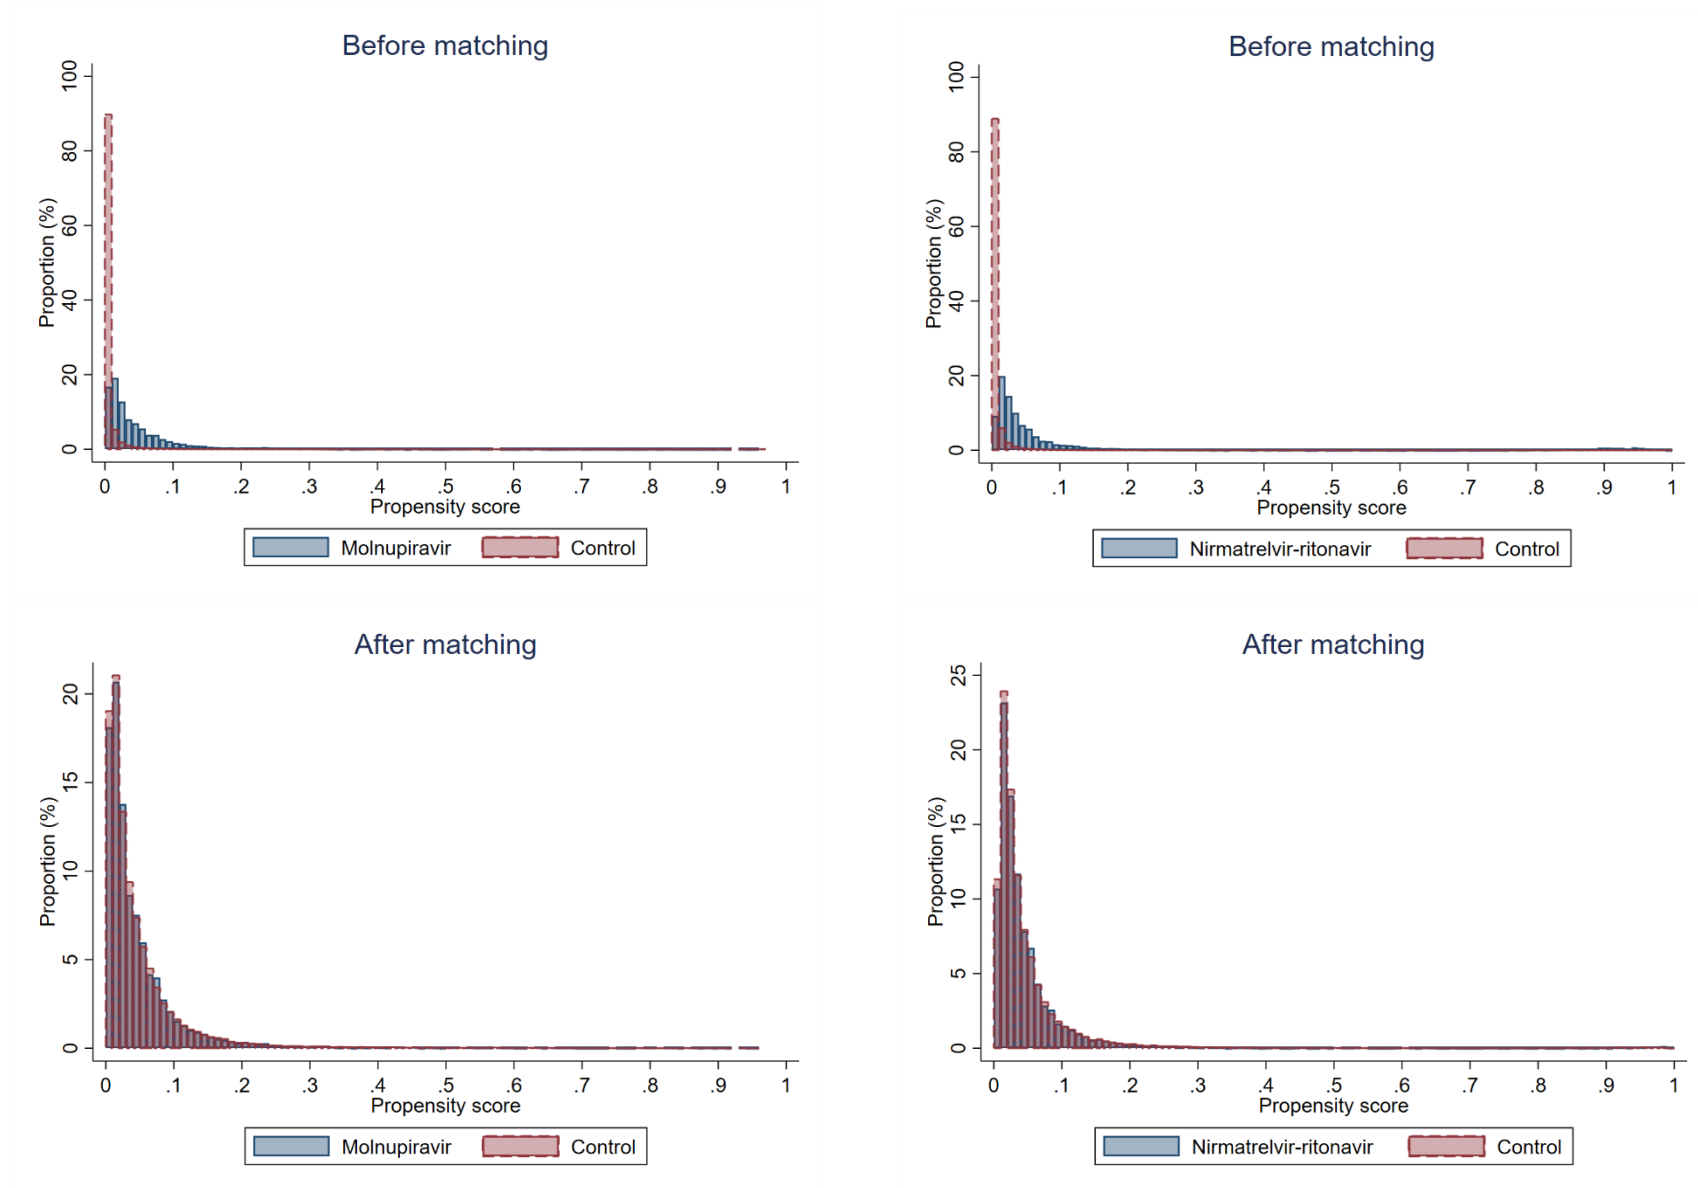

Supplement: mmc2.pdf [file mmc2.pdf]
