# Supplementary material
Source: PubMed Central journal article supplement (PMC9539539)
Supplement: mmc1.pdf [file mmc1.pdf]

# THE LANCET

## Supplementary appendix 1

This translation in Chinese was submitted by the authors and we reproduce it as supplied. It has not been peer reviewed. *The Lancet's* editorial processes have only been applied to the original in English, which should serve as reference for this manuscript.

此简体中文译文由作者提交，我方按照提供的版本刊登。此译文并未经过同行审阅。医学期刊《柳叶刀》的编辑流程仅适用于英文原稿，英文原稿应作为此手稿的参考。

Supplement to: Wong CKH, Au ICH, Lau KTK, et al. Real-world effectiveness of molnupiravir and nirmatrelvir plus ritonavir against mortality, hospitalisation, and in-hospital outcomes among community-dwelling, ambulatory patients with confirmed SARS-CoV-2 infection during the omicron wave in Hong Kong: an observational study. *Lancet* 2022; **400**: 1213–22.

題目 香港 SARS-COV-2 Omicron 流行期間社區居住的新冠肺炎門診患者使用 Molnupiravir（莫努匹韋）和 Nirmatrelvir/Ritonavir（帕昔洛韋）的對死亡率、住院和院內預後的真實世界療效：一項觀察性研究

背景 口服抗病毒藥物對 SARS-COV-2 omicron（B.1.1.529）亞型 BA.2.2 的真實世界療效知之甚少。我們的目的是評估兩種口服抗病毒藥物在香港社區居住的新冠肺炎門診患者中的臨床效果。

方法 在這項觀察性研究中，我們使用了香港醫院管理局的數據，識別了一組在 2022 年 2 月 26 日至 6 月 26 日，Omicron 亞型 BA.2.2 在香港占主導地位的期間，正式登記為新冠肺炎感染的非住院患者。我們採用回顧性隊列設計作為主要分析，並採用病例對照設計作為敏感性分析。我們納入了接受莫努匹韋或帕昔洛韋治療的新冠肺炎患者。根據年齡、性別、新冠肺炎診斷日期、Charlson 共病指數評分和疫苗接種狀態，使用 1 比 10 傾向評分匹配法將使用口服抗病毒藥物的門診患者與對照組進行匹配。研究事件是死亡、與新冠肺炎相關的住院和院內疾病進展（院內死亡、入侵式呼吸器治療或入住深切治療部病房）。Cox 回歸估計了 HR（風險比），logistic 回歸估計了口服抗病毒藥物組與非口服抗病毒藥物組的優勢比。

結果 在 1074856 例未住院的新冠肺炎患者中，5383 例在社區接受了莫努匹韋治療，6464 例在社區接受了帕昔洛韋治療。莫努匹韋組和帕昔洛韋組患者的中位隨訪時間分別為 103 天和 99 天。與帕昔洛韋相比，使用莫努匹韋的患者年齡更大（年齡 > 60 歲: 4758 例 [85.9%] 與 4418 例 [88.7%] 相比），而且完全接種疫苗的可能性更小（1850 例 [33% 4%] 與 800 例 [16.1%] 相比）。與不使用莫努匹韋相比，使用莫努匹韋的死亡率（HR=0.76，95%CI=0.61-0.95）和院內疾病進展（HR=0.57，95%CI=0.43-0.76）較低，而兩組住院風險相似（HR=0.98，95%CI=0.89-1.06）。與未使用相比，使用帕昔洛韋的死亡風險（HR=0.34，95%CI=0.22-0.52）、住院風險（HR=0.76，95%CI=0.67-0.86）和院內疾病進展風險（HR=0.57，95%CI=0.38-0.87）較低。在老年患者中，我們一致發現早期口服抗病毒藥物可降低死亡率和住院風險。病例對照分析的結果廣泛支持主要分析的結果。

結論 在香港 SARS-COV-2 Omicron 亞型 BA.2.2 的流行期間，非住院的新冠肺炎患者早期開始使用口服抗病毒藥物與降低死亡率和院內疾病進展風險相關。此外，使用帕昔洛韋與住院風險降低相關。

項目資助 香港特別行政區政府醫務衛生局醫療衛生研究基金
